# Supplementary material for: α-Glucosidase, α-Amylase and Antioxidant Evaluations of Isolated Bioactives from Wild Strawberry
Source: MDPI journal article supplement (doi:10.3390/molecules27113444), 2022-05-26
Supplement: s1 [file s1]

Supplementary Materials

# $\alpha$ -Glucosidase, $\alpha$ -Amylase and Antioxidant Evaluations of Isolated Bioactives from Wild Strawberry

Mohammed A. Huneif <sup>1</sup>, Seham M. Alqahtani <sup>1</sup>, Alqahtani Abdulwahab <sup>1</sup>, Sultan A. Almedhesh <sup>1</sup>, Mater H. Mahnashi <sup>2,\*</sup>, Muhammad Riaz <sup>3</sup>, Najm Ur-Rahman <sup>3</sup>, Muhammad Saeed Jan <sup>4</sup>, Farhat Ullah <sup>5</sup>, Muhammad Aasim <sup>6</sup> and Abdul Sadiq <sup>5,\*</sup>

<sup>1</sup> Pediatric Department, Medical College, Najran University, Najran 55461, Saudi Arabia; huneif@hotmail.com (M.A.H.); drseham2015@gmail.com (S.M.A.); aalsharih@nu.edu.sa (A.A.); almedhesh31@hotmail.com (S.A.A.)

<sup>2</sup> Department of Pharmaceutical Chemistry, College of Pharmacy, Najran University, Najran 55461, Saudi Arabia

<sup>3</sup> Department of Pharmacy, Shaheed Benazir Bhutto University, Sheringal 18050, Pakistan; pharmariaz@gmail.com (M.R.); najm@sbbu.edu.pk (N.U.-R.)

<sup>4</sup> Department of Pharmacy, University of Swabi, Swabi, Pakistan; saeedjanpharmacist@gmail.com

<sup>5</sup> Department of Pharmacy, Faculty of Biological Sciences, University of Malakand, Chakdara 18000, Pakistan; farhataziz80@hotmail.com

<sup>6</sup> Department of Biotechnology, Faculty of Biological Sciences, University of Malakand, Chakdara 18000, Pakistan; draasim@uom.edu.pk

\* Correspondence: mhmahneshi@nu.edu.sa (M.H.M.); sadiquom@yahoo.com (A.S.); Tel.: +96-65-0873-4539 (M.H.M.); +92-03-01-229-7102 (A.S.)

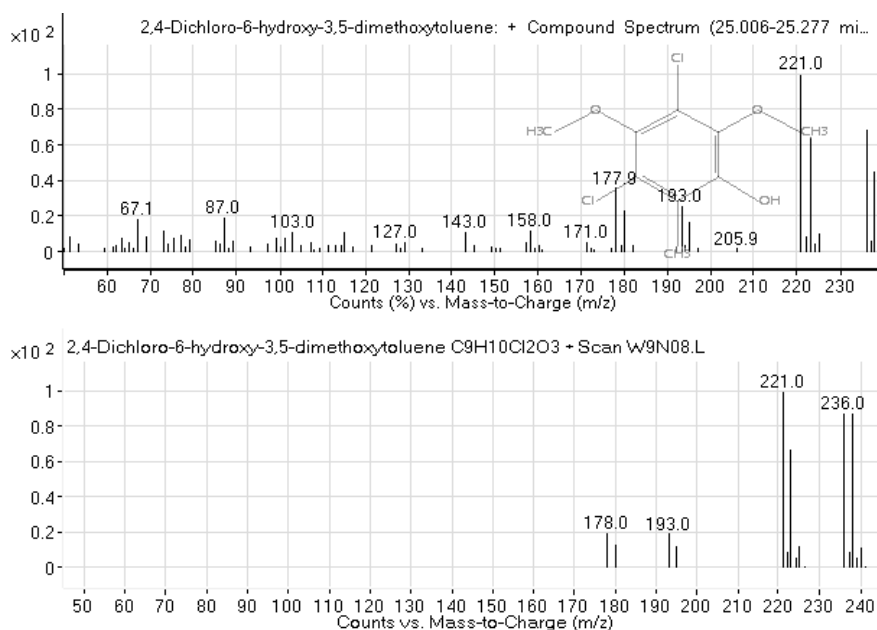

Figure S1. GC-MS chromatogram of Compound 1.

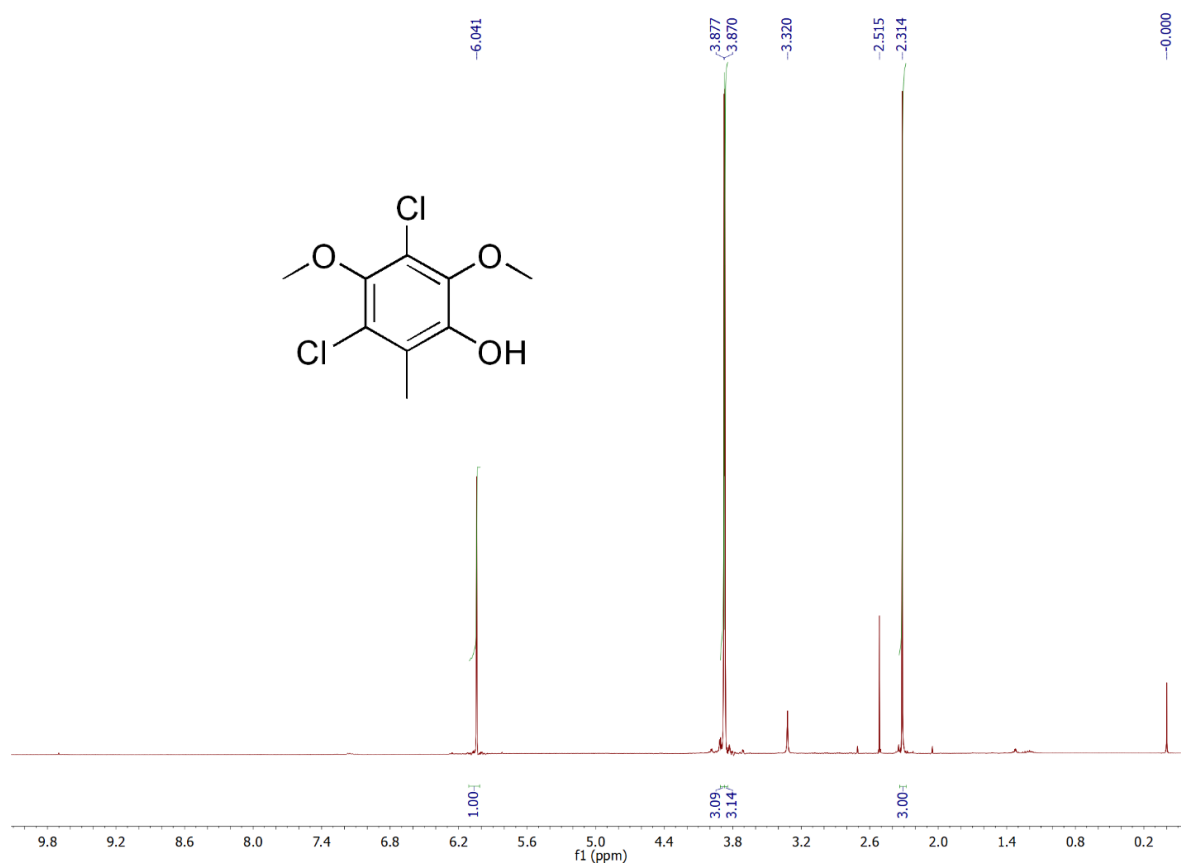

Figure S2. <sup>1</sup>H-NMR spectrum of Compound 1.

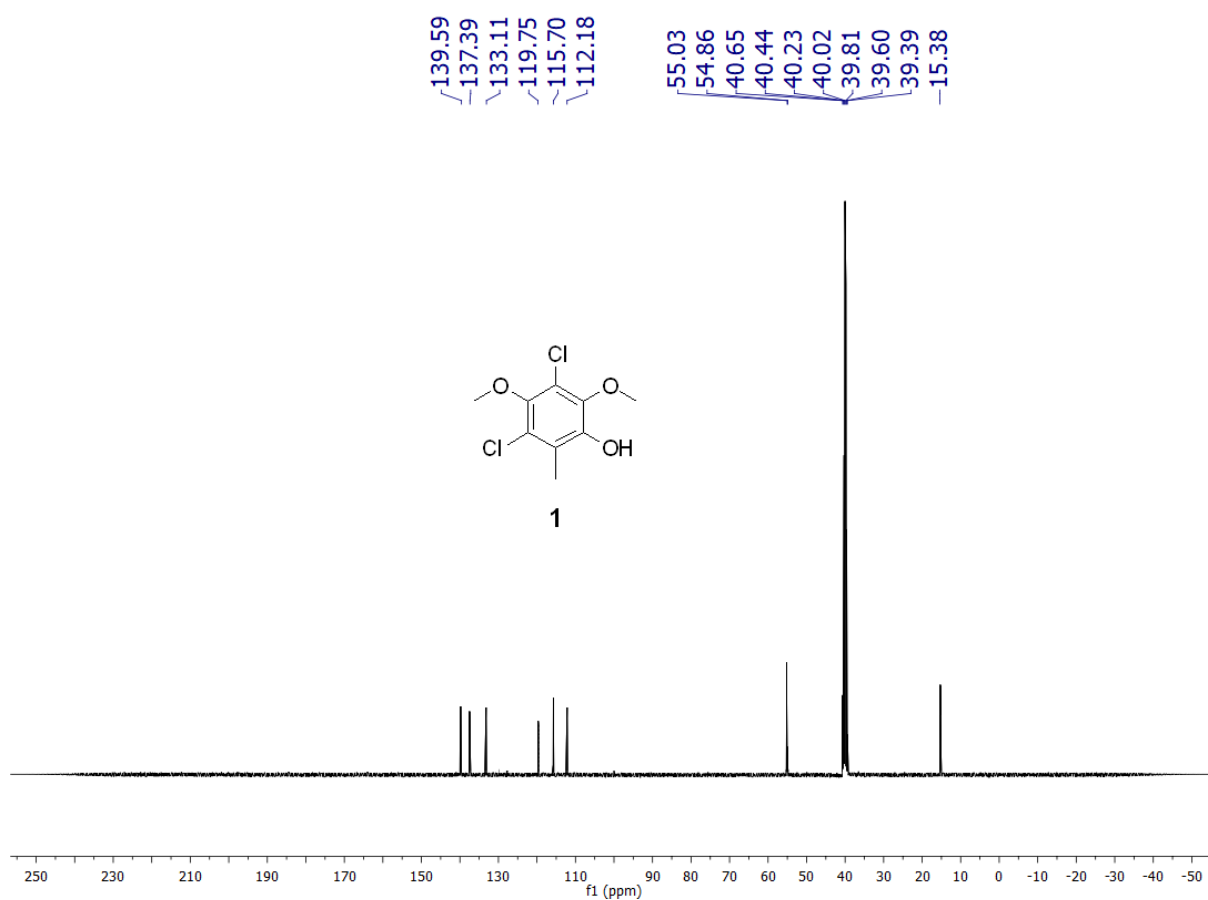

Figure S3. <sup>13</sup>C-NMR spectrum of Compound 1.

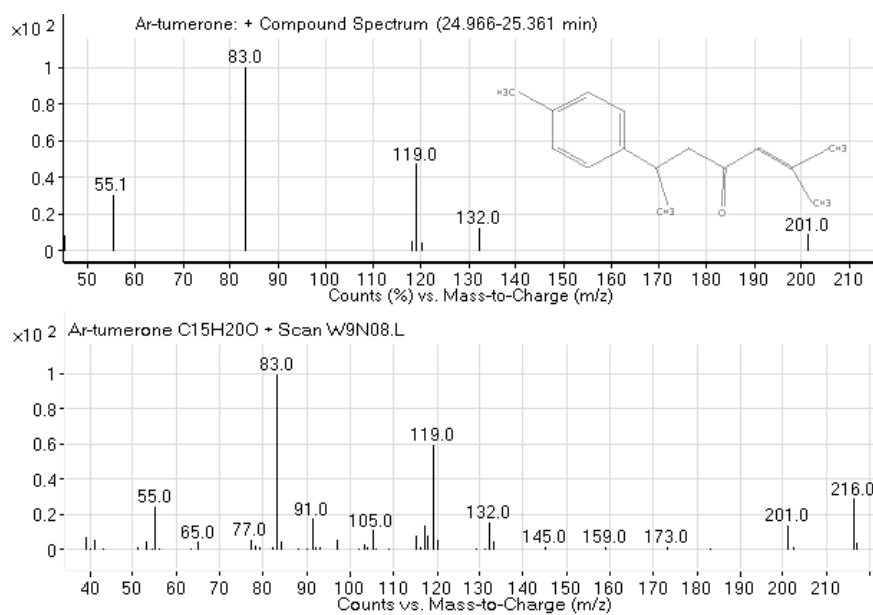

Figure S4. GC-MS chromatogram of Compound 2.

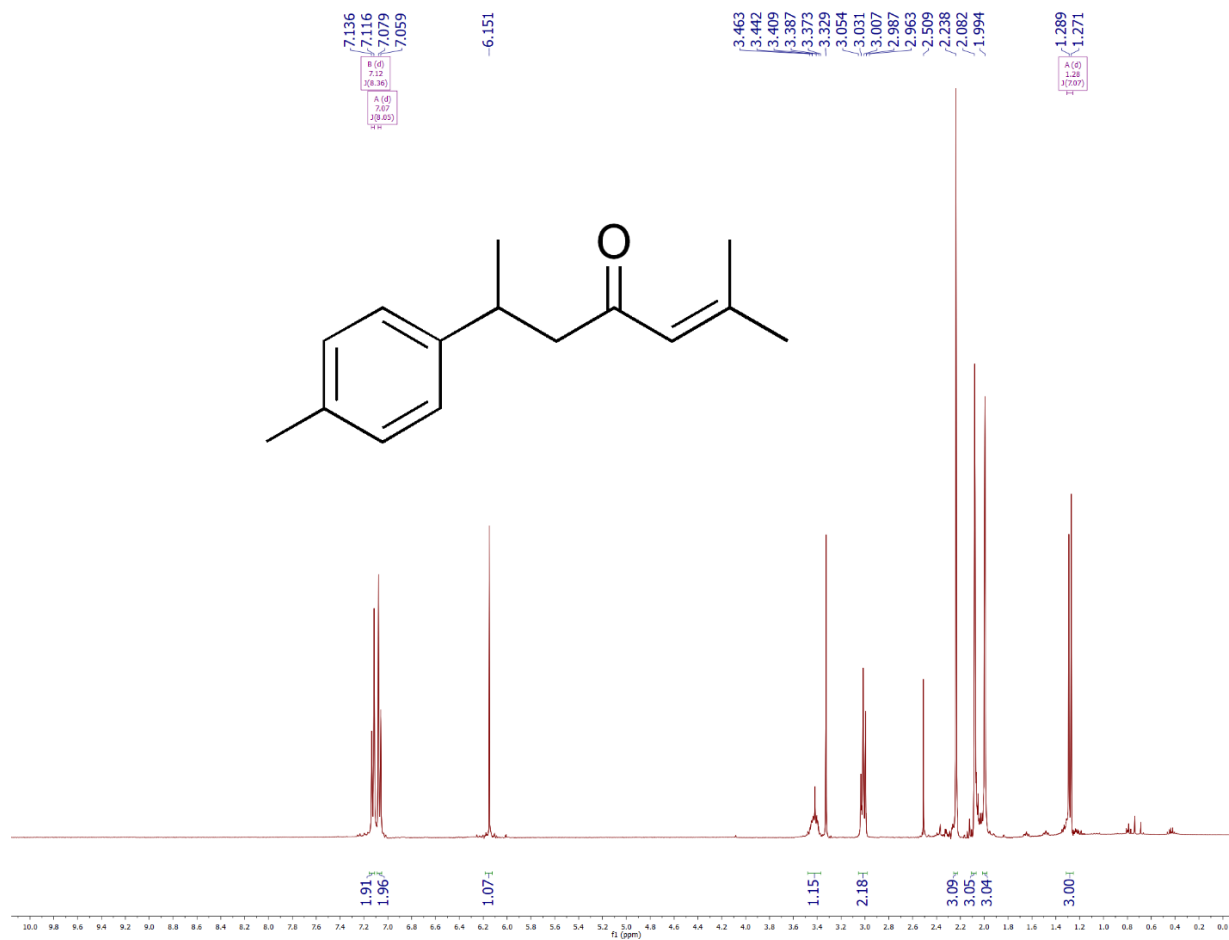

Figure S5. <sup>1</sup>H-NMR spectrum of Compound 2.

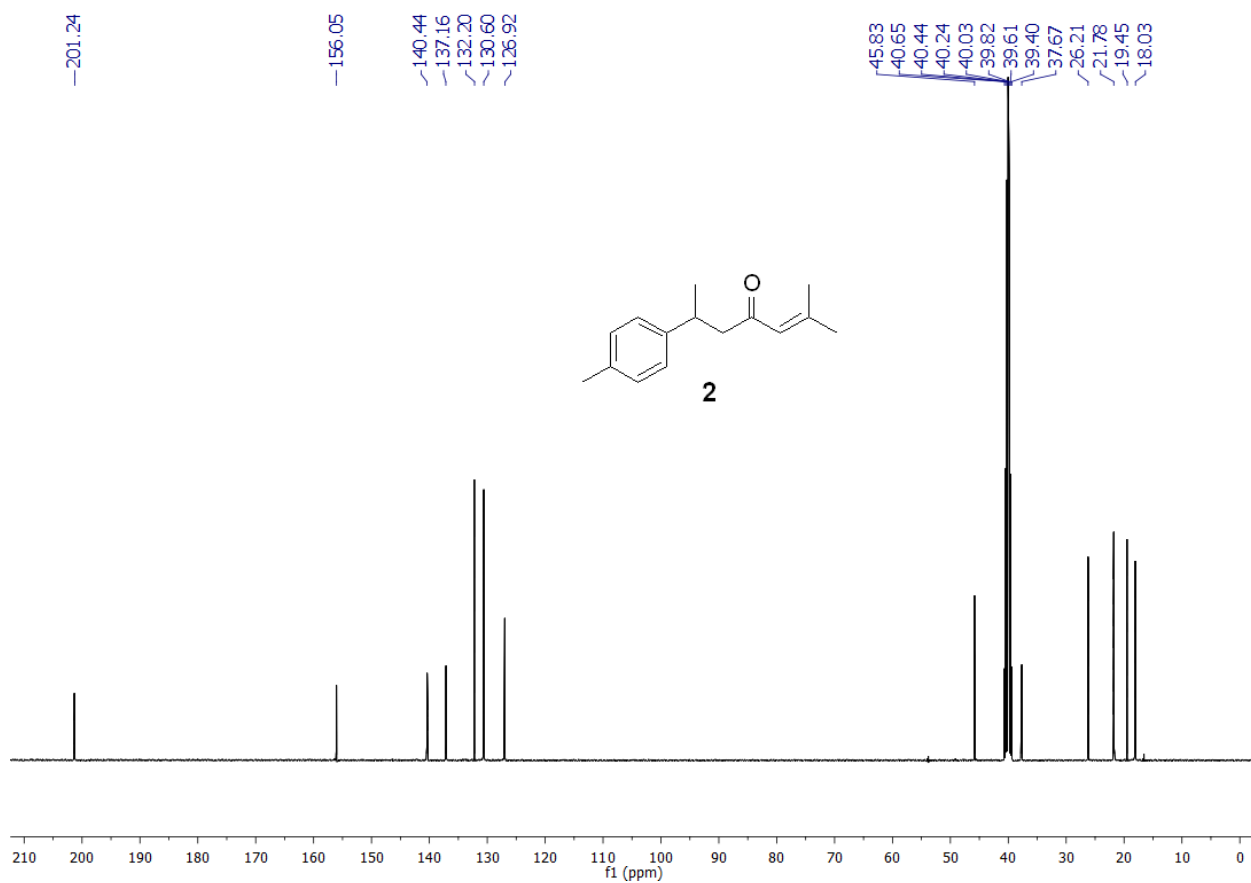

Figure S6. <sup>13</sup>C-NMR spectrum of Compound 2.
